# Supplementary material for: Integrated Analysis of Summary Statistics to Identify Pleiotropic Genes and Pathways for the Comorbidity of Schizophrenia and Cardiometabolic Disease
Source: Front Psychiatry. 2020 Apr 17;11:256. doi: 10.3389/fpsyt.2020.00256 (PMC7212438; doi:10.3389/fpsyt.2020.00256)
Supplement: Supplementary file 1 [file Table_1.xlsx]

## Sheet: Sheet1
Supplemental Table S1. The information of GWAS summary datasets of diseases
Disease	Description	Sample_size	N Cases	N Controls	Population	Pubmed ID	Downloaded from
SCZ	Schizophrenia	-	36989	113075	European, east Asian	25056061	https://www.med.unc.edu/pgc/
BMI	Body mass index	322154	-	-	European	25673413	http://portals.broadinstitute.org/collaboration/giant/index.php/GIANT_consortium_data_files
CAD	Coronary artery disease	-	60801	123504	European, South Asian, East Asian, Hispanic and African Americans	26343387	http://www.cardiogramplusc4d.org/data-downloads/
T2D	Type 2 diabetes	-	74124	824006	European	30297969	http://www.diagram-consortium.org/downloads.html
HDL	High-density lipoproteins	99900	-	-	European	20686565	http://csg.sph.umich.edu/willer/public/lipids2010/
LDL	Low-density lipoproteins	95454	-	-	European	20686565	http://csg.sph.umich.edu/willer/public/lipids2010/
TC	Total Cholestrol	100184	-	-	European	20686565	http://csg.sph.umich.edu/willer/public/lipids2010/
TG	Triglycerides	96598	-	-	European	20686565	http://csg.sph.umich.edu/willer/public/lipids2010/
