# Supplementary material for: Integrated Analysis of Summary Statistics to Identify Pleiotropic Genes and Pathways for the Comorbidity of Schizophrenia and Cardiometabolic Disease
Source: Front Psychiatry. 2020 Apr 17;11:256. doi: 10.3389/fpsyt.2020.00256 (PMC7212438; doi:10.3389/fpsyt.2020.00256)
Supplement: Supplementary file 10 [file Table_10.xlsx]

## Sheet: Sheet1
Supplemental Table S10. The KEGG pathway enrichment analysis of causal genes identified by each approach for SCZ and CMD
The KEGG pathway enrichment analysis for SCZ
ID	Description	pvalue	p.adjust	geneID	Count
hsa04728	Dopaminergic synapse	0.000129788	0.0330958	CACNA1C/GRIA1/TH/CACNA1D/AKT3/PPP2R2A/DRD2/GRIN2A/PLCB2/PPP2R3C/CREB3L1	11
hsa04261	Adrenergic signaling in cardiomyocytes	0.000401913	0.0425047	MAPK3/CACNA1C/CACNA2D4/CACNA1D/AKT3/PPP2R2A/CACNB2/ATP2A2/PLCB2/PPP2R3C/CREB3L1	11
hsa05030	Cocaine addiction	0.000641951	0.0425047	GRM2/TH/GRM3/DRD2/GRIN2A/CREB3L1	6
hsa05031	Amphetamine addiction	0.000666741	0.0425047	CACNA1C/ARC/GRIA1/TH/CACNA1D/GRIN2A/CREB3L1	7
The KEGG pathway enrichment analysis for BMI
ID	Description	pvalue	p.adjust	geneID	Count
hsa04921	Oxytocin signaling pathway	1.45324e-08	2.01777e-06	ADCY3/NFATC3/MAP2K5/MAPK3/GNAI3/MEF2C/GNAO1/CAMKK2/GNAI2/PPP3CA/PLCB3/ADCY9/PRKCB/CACNB3/MAP2K1/PLCB1/KCNJ12/PPP1CC/NRAS/PPP1CB/CALM3	21
hsa04916	Melanogenesis	1.65391e-08	2.01777e-06	ADCY3/MAPK3/WNT1/TCF7L2/GNAI3/GSK3B/GNAO1/EP300/GNAI2/PLCB3/ADCY9/PRKCB/CTNNB1/MAP2K1/PLCB1/NRAS/CALM3	17
hsa04914	Progesterone-mediated oocyte maturation	4.91321e-07	3.99608e-05	ADCY3/MAPK3/PKMYT1/MAD1L1/ANAPC4/GNAI3/HSP90AA1/GNAI2/AKT3/PIK3R3/IGF1R/ADCY9/CDC25A/MAP2K1/ANAPC7	15
hsa04919	Thyroid hormone signaling pathway	1.07279e-06	6.54401e-05	MAPK3/PFKP/GSK3B/NCOA1/EP300/AKT3/PIK3R3/NCOR1/PLCB3/PRKCB/CTNNB1/MAP2K1/ATP2A2/PLCB1/NRAS/ATP2A1	16
hsa05225	Hepatocellular carcinoma	1.5617e-06	7.14694e-05	SMARCD2/MAPK3/WNT1/POLK/TCF7L2/GSK3B/AXIN1/E2F3/AKT3/PIK3R3/DDB2/IGF1R/PBRM1/FRAT1/PRKCB/CTNNB1/MAP2K1/SMARCC1/NRAS	19
hsa05213	Endometrial cancer	1.75745e-06	7.14694e-05	MAPK3/POLK/TCF7L2/GSK3B/AXIN1/AKT3/PIK3R3/DDB2/CTNNB1/MAP2K1/NRAS	11
hsa04725	Cholinergic synapse	2.46728e-06	7.79395e-05	ADCY3/MAPK3/GNAI3/GNAO1/GNAI2/AKT3/PIK3R3/PLCB3/ADCY9/PRKCB/MAP2K1/PLCB1/KCNJ12/KCNQ5/NRAS	15
hsa05163	Human cytomegalovirus infection	2.75483e-06	7.79395e-05	ADCY3/NFATC3/MAPK3/GNAI3/GSK3B/GNAO1/E2F3/GNAI2/AKT3/PIK3R3/PTK2B/RAC1/PPP3CA/PLCB3/ADCY9/PRKCB/CTNNB1/MAP2K1/PLCB1/SP1/NRAS/CALM3	22
hsa04114	Oocyte meiosis	2.87482e-06	7.79395e-05	ADCY3/MAPK3/PKMYT1/MAD1L1/ANAPC4/PPP2R5C/PPP3CA/IGF1R/ADCY9/YWHAZ/YWHAB/MAP2K1/PPP1CC/ANAPC7/PPP1CB/CALM3	16
hsa04540	Gap junction	3.86966e-06	9.19346e-05	ADCY3/MAP2K5/MAPK3/TUBA1A/TUBA1C/GNAI3/GNAI2/PLCB3/ADCY9/PRKCB/MAP2K1/PLCB1/NRAS	13
hsa05224	Breast cancer	4.14459e-06	9.19346e-05	MAPK3/WNT1/POLK/TCF7L2/GSK3B/NCOA1/AXIN1/E2F3/AKT3/PIK3R3/DDB2/IGF1R/FRAT1/CTNNB1/MAP2K1/SP1/NRAS	17
hsa04722	Neurotrophin signaling pathway	5.32363e-06	0.000108247	SH2B1/MAP2K5/MAPK3/MAP3K3/SH2B3/GSK3B/RPS6KA5/AKT3/PIK3R3/SORT1/RAC1/MAP2K1/NRAS/CALM3/BDNF	15
hsa04022	cGMP-PKG signaling pathway	5.90857e-06	0.000110899	ADCY3/NFATC3/MAPK3/GNAI3/MEF2C/GNAI2/AKT3/PPP3CA/PLCB3/KCNMA1/ADCY9/MAP2K1/ATP2A2/PLCB1/PPP1CC/PPP1CB/CALM3/ATP2A1	18
hsa04720	Long-term potentiation	7.68416e-06	0.000125908	MAPK3/EP300/PPP3CA/PLCB3/PRKCB/MAP2K1/PLCB1/PPP1CC/NRAS/PPP1CB/CALM3	11
hsa04915	Estrogen signaling pathway	7.74026e-06	0.000125908	ADCY3/MAPK3/GNAI3/HSP90AA1/NCOA1/GNAO1/GNAI2/AKT3/PIK3R3/PLCB3/ADCY9/MAP2K1/PLCB1/SP1/NRAS/CALM3	16
hsa05215	Prostate cancer	1.162e-05	0.000169553	MAPK3/TCF7L2/HSP90AA1/GSK3B/EP300/E2F3/AKT3/PIK3R3/IGF1R/CTNNB1/MAP2K1/NRAS/ETV5	13
hsa04015	Rap1 signaling pathway	1.18131e-05	0.000169553	ADCY3/MAPK3/LAT/GNAI3/GNAO1/PFN1/GNAI2/AKT3/PIK3R3/RAC1/IGF1R/PLCB3/ADCY9/PRKCB/CTNNB1/MAP2K1/PLCB1/MAGI2/NRAS/CALM3	20
hsa05210	Colorectal cancer	1.66997e-05	0.000224547	MAPK3/POLK/TCF7L2/GSK3B/AXIN1/AKT3/PIK3R3/DDB2/RAC1/CTNNB1/MAP2K1/NRAS	12
hsa04730	Long-term depression	1.74852e-05	0.000224547	MAPK3/GNAI3/GNAO1/GNAI2/IGF1R/PLCB3/PRKCB/MAP2K1/PLCB1/NRAS	10
hsa04261	Adrenergic signaling in cardiomyocytes	2.0642e-05	0.000251832	ADCY3/MAPK3/GNAI3/PPP2R5C/RPS6KA5/GNAI2/AKT3/PLCB3/ADCY9/CACNB3/ATP2A2/PLCB1/PPP1CC/PPP1CB/CALM3/ATP2A1	16
hsa05214	Glioma	2.335e-05	0.000271304	MAPK3/POLK/E2F3/AKT3/PIK3R3/DDB2/IGF1R/PRKCB/MAP2K1/NRAS/CALM3	11
hsa04928	Parathyroid hormone synthesis, secretion and action	3.06937e-05	0.000340421	ADCY3/MAPK3/MMP25/GNAI3/MEF2C/GNAI2/JUND/PLCB3/ADCY9/PRKCB/MAP2K1/PLCB1/SP1	13
hsa04310	Wnt signaling pathway	4.9952e-05	0.000529926	NFATC3/WNT1/TCF7L2/GSK3B/EP300/AXIN1/CACYBP/RAC1/PPP3CA/PLCB3/FRAT1/PRKCB/CTNNB1/CTBP2/PLCB1/LGR4	16
hsa04662	B cell receptor signaling pathway	5.4756e-05	0.000543569	NFATC3/MAPK3/CD79B/GSK3B/AKT3/PIK3R3/RAC1/PPP3CA/PRKCB/MAP2K1/NRAS	11
hsa04140	Autophagy - animal	5.56935e-05	0.000543569	MAPK3/RPTOR/AMBRA1/RRAGD/PIK3C3/CAMKK2/AKT3/PIK3R3/IGF1R/ZFYVE1/MAP2K1/ATG13/HMGB1/NRAS	14
hsa04728	Dopaminergic synapse	7.19567e-05	0.000675286	GNAI3/PPP2R5C/GSK3B/GNAO1/GNAI2/AKT3/ARNTL/PPP3CA/PLCB3/PRKCB/PLCB1/PPP1CC/PPP1CB/CALM3	14
hsa04934	Cushing syndrome	0.000124872	0.00112847	ADCY3/MAPK3/WNT1/TCF7L2/GNAI3/GSK3B/AXIN1/E2F3/GNAI2/PLCB3/ADCY9/CTNNB1/MAP2K1/PLCB1/SP1	15
hsa05216	Thyroid cancer	0.000143892	0.00125391	MAPK3/POLK/TCF7L2/DDB2/CTNNB1/MAP2K1/NRAS	7
hsa04024	cAMP signaling pathway	0.00016486	0.0013871	ADCY3/MAPK3/HCN4/GIPR/GNAI3/EP300/GNAI2/AKT3/PIK3R3/RAC1/ADCY9/MAP2K1/ATP2A2/PPP1CC/PPP1CB/CALM3/BDNF/ATP2A1	18
hsa04912	GnRH signaling pathway	0.000174707	0.00142095	ADCY3/MAPK3/MAP3K3/PTK2B/PLCB3/ADCY9/PRKCB/MAP2K1/PLCB1/NRAS/CALM3	11
hsa05223	Non-small cell lung cancer	0.000230773	0.00181641	MAPK3/POLK/E2F3/AKT3/PIK3R3/DDB2/PRKCB/MAP2K1/NRAS	9
hsa04713	Circadian entrainment	0.00025463	0.00188417	ADCY3/MAPK3/GNAI3/GNAO1/RPS6KA5/GNAI2/PLCB3/ADCY9/PRKCB/PLCB1/CALM3	11
hsa04926	Relaxin signaling pathway	0.000254827	0.00188417	ADCY3/MAPK3/COL4A4/GNAI3/GNAO1/GNAI2/AKT3/PIK3R3/PLCB3/ADCY9/MAP2K1/PLCB1/NRAS	13
hsa01522	Endocrine resistance	0.000278847	0.00199169	ADCY3/MAPK3/E2F3/AKT3/PIK3R3/IGF1R/NCOR1/ADCY9/MAP2K1/SP1/NRAS	11
hsa05226	Gastric cancer	0.000285693	0.00199169	MAPK3/WNT1/POLK/TCF7L2/GSK3B/AXIN1/E2F3/AKT3/PIK3R3/DDB2/FRAT1/CTNNB1/MAP2K1/NRAS	14
hsa04062	Chemokine signaling pathway	0.000375295	0.00254366	ADCY3/MAPK3/GNAI3/GSK3B/GNAI2/AKT3/PIK3R3/PTK2B/PREX1/RAC1/PLCB3/ADCY9/PRKCB/MAP2K1/PLCB1/NRAS	16
hsa04071	Sphingolipid signaling pathway	0.000406362	0.00267979	MAPK3/GNAI3/PPP2R5C/GNAI2/AKT3/PIK3R3/RAC1/PLCB3/PRKCB/MAP2K1/PLCB1/NRAS	12
hsa04371	Apelin signaling pathway	0.000426761	0.00273882	ADCY3/MAPK3/GNAI3/PIK3C3/MEF2C/GNAI2/AKT3/PLCB3/ADCY9/MAP2K1/PLCB1/NRAS/CALM3	13
hsa04520	Adherens junction	0.000448987	0.00273882	MAPK3/TCF7L2/VCL/EP300/RAC1/IGF1R/CTNNB1/BAIAP2/WASF3	9
hsa05218	Melanoma	0.000448987	0.00273882	MAPK3/POLK/E2F3/AKT3/PIK3R3/DDB2/IGF1R/MAP2K1/NRAS	9
hsa05135	Yersinia infection	0.000473642	0.00281875	NFATC3/MAPK3/LAT/SKAP2/GSK3B/ARHGEF7/AKT3/PIK3R3/PTK2B/RAC1/MAP2K1/BAIAP2	12
hsa04211	Longevity regulating pathway	0.000522061	0.00303206	ADCY3/RPTOR/CAMKK2/AKT3/PIK3R3/IGF1R/ADCY9/ATG13/EHMT1/NRAS	10
hsa04370	VEGF signaling pathway	0.000534339	0.00303206	MAPK3/AKT3/PIK3R3/RAC1/PPP3CA/PRKCB/MAP2K1/NRAS	8
hsa04110	Cell cycle	0.000592037	0.00328311	PKMYT1/MAD1L1/ANAPC4/RBL1/GSK3B/EP300/E2F3/STAG1/CDC25A/YWHAZ/YWHAB/ANAPC7	12
hsa05220	Chronic myeloid leukemia	0.000672409	0.00364595	MAPK3/POLK/E2F3/AKT3/PIK3R3/DDB2/MAP2K1/CTBP2/NRAS	9
hsa04666	Fc gamma R-mediated phagocytosis	0.000806991	0.00428056	MAPK3/LAT/ARPC3/AKT3/PIK3R3/RAC1/PRKCB/MAP2K1/CFL1/WASF3	10
hsa05217	Basal cell carcinoma	0.000835859	0.00433935	WNT1/POLK/TCF7L2/GSK3B/AXIN1/SUFU/DDB2/CTNNB1	8
hsa05167	Kaposi sarcoma-associated herpesvirus infection	0.000894989	0.00454953	NFATC3/MAPK3/PIK3C3/GSK3B/EP300/E2F3/AKT3/PIK3R3/PREX1/RAC1/PPP3CA/CTNNB1/MAP2K1/NRAS/CALM3	15
hsa04724	Glutamatergic synapse	0.00102052	0.00508178	ADCY3/MAPK3/GNAI3/GNAO1/GNAI2/PPP3CA/PLCB3/ADCY9/GRM2/PRKCB/PLCB1	11
hsa05231	Choline metabolism in cancer	0.00120913	0.00580708	MAPK3/DGKG/AKT3/PIK3R3/RAC1/PRKCB/MAP2K1/SP1/NRAS/WASF3	10
hsa04150	mTOR signaling pathway	0.00121378	0.00580708	MAPK3/RPTOR/WNT1/RRAGD/GSK3B/AKT3/PIK3R3/CLIP1/ATP6V1E1/IGF1R/PRKCB/MAP2K1/NRAS	13
hsa05170	Human immunodeficiency virus 1 infection	0.00123777	0.005808	NFATC3/MAPK3/GNAI3/GNAO1/AP1S1/GNAI2/AKT3/PIK3R3/PTK2B/RAC1/PPP3CA/PRKCB/MAP2K1/CFL1/NRAS/CALM3	16
hsa04810	Regulation of actin cytoskeleton	0.00136616	0.0062895	MAPK3/ITGA11/IQGAP2/ARPC3/VCL/ARHGEF7/PFN1/PIK3R3/RAC1/SSH2/MAP2K1/CFL1/BAIAP2/PPP1CC/NRAS/PPP1CB	16
hsa04910	Insulin signaling pathway	0.00143141	0.00646787	MAPK3/RPTOR/GSK3B/PYGB/PRKAR2A/AKT3/PIK3R3/MAP2K1/PPP1CC/NRAS/PPP1CB/CALM3	12
hsa04550	Signaling pathways regulating pluripotency of stem cells	0.00162174	0.00719462	MAPK3/WNT1/GSK3B/AXIN1/ACVR2B/AKT3/PIK3R3/IGF1R/ZFHX3/CTNNB1/MAP2K1/NRAS	12
hsa04923	Regulation of lipolysis in adipocytes	0.0017369	0.00743639	ADCY3/GNAI3/GNAI2/AKT3/PIK3R3/ADCY9/PNPLA2	7
hsa05166	Human T-cell leukemia virus 1 infection	0.00173719	0.00743639	ADCY3/NFATC3/MAPK3/MAP3K3/MAD1L1/ANAPC4/EP300/VAC14/E2F3/AKT3/PIK3R3/PPP3CA/ADCY9/MAP2K1/ANAPC7/NRAS	16
hsa04510	Focal adhesion	0.0017698	0.00744537	MAPK3/ITGA11/COL4A4/VCL/RASGRF1/GSK3B/AKT3/PIK3R3/RAC1/IGF1R/PRKCB/CTNNB1/MAP2K1/PPP1CC/PPP1CB	15
hsa04218	Cellular senescence	0.00182326	0.00754026	NFATC3/MAPK3/RBL1/E2F3/AKT3/PIK3R3/PPP3CA/CDC25A/MAP2K1/PPP1CC/NRAS/PPP1CB/CALM3	13
hsa04360	Axon guidance	0.00196387	0.00798639	NFATC3/MAPK3/GNAI3/NEO1/GSK3B/GNAI2/PIK3R3/RAC1/PPP3CA/SSH2/EPHB1/NTNG1/CFL1/NRAS	14
hsa04611	Platelet activation	0.00202534	0.00810136	ADCY3/MAPK3/GNAI3/GNAI2/AKT3/PIK3R3/PLCB3/ADCY9/PLCB1/PPP1CC/PPP1CB	11
hsa05235	PD-L1 expression and PD-1 checkpoint pathway in cancer	0.00209163	0.00823158	NFATC3/MAPK3/MAP3K3/LAT/AKT3/PIK3R3/PPP3CA/MAP2K1/NRAS	9
hsa05161	Hepatitis B	0.00215262	0.00833715	NFATC3/MAPK3/EP300/E2F3/AKT3/PIK3R3/PTK2B/DDB2/YWHAZ/PRKCB/YWHAB/MAP2K1/NRAS	13
hsa04931	Insulin resistance	0.00233776	0.0089127	GSK3B/PYGB/AKT3/PIK3R3/PRKCB/MLXIP/PPP1CC/GFPT1/PPP1CB/SLC27A1	10
hsa04971	Gastric acid secretion	0.00261866	0.00968112	ADCY3/GNAI3/GNAI2/PLCB3/ADCY9/PRKCB/PLCB1/CALM3	8
hsa05212	Pancreatic cancer	0.00261866	0.00968112	MAPK3/POLK/E2F3/AKT3/PIK3R3/DDB2/RAC1/MAP2K1	8
hsa04072	Phospholipase D signaling pathway	0.00275448	0.0100312	ADCY3/MAPK3/DGKG/AKT3/PIK3R3/PTK2B/PLCB3/ADCY9/GRM2/MAP2K1/PLCB1/NRAS	12
hsa04010	MAPK signaling pathway	0.00286851	0.0102929	NFATC3/MAP2K5/MAPK3/MAP3K3/RASGRF1/MEF2C/RPS6KA5/AKT3/JUND/RAC1/PPP3CA/MAP3K12/IGF1R/RASA2/PRKCB/CACNB3/MAP2K1/NRAS/BDNF	19
hsa04270	Vascular smooth muscle contraction	0.00331241	0.0117134	ADCY3/MAPK3/PLCB3/KCNMA1/ADCY9/PRKCB/MAP2K1/PLCB1/PPP1CC/PPP1CB/CALM3	11
hsa04213	Longevity regulating pathway - multiple species	0.00348241	0.0121387	ADCY3/RPTOR/AKT3/PIK3R3/IGF1R/ADCY9/NRAS	7
hsa01521	EGFR tyrosine kinase inhibitor resistance	0.00362927	0.0122992	MAPK3/GSK3B/AKT3/PIK3R3/IGF1R/PRKCB/MAP2K1/NRAS	8
hsa03018	RNA degradation	0.00362927	0.0122992	PFKP/XRN2/CNOT9/ZCCHC7/EXOSC10/DHX36/TOB2/EXOSC6	8
hsa04972	Pancreatic secretion	0.00403767	0.0134958	ADCY3/RAC1/PLCB3/KCNMA1/ADCY9/PRKCB/ATP2A2/PLCB1/ATP2A1	9
hsa04750	Inflammatory mediator regulation of TRP channels	0.00461862	0.0150259	ADCY3/PIK3R3/PLCB3/ADCY9/PRKCB/PLCB1/PPP1CC/PPP1CB/CALM3	9
hsa04933	AGE-RAGE signaling pathway in diabetic complications	0.00461862	0.0150259	MAPK3/COL4A4/AKT3/PIK3R3/RAC1/PLCB3/PRKCB/PLCB1/NRAS	9
hsa05418	Fluid shear stress and atherosclerosis	0.00491525	0.0156302	MAP2K5/HSP90AA1/MEF2C/PIAS4/ACVR2B/ARHGEF2/AKT3/PIK3R3/RAC1/CTNNB1/CALM3	11
hsa04660	T cell receptor signaling pathway	0.00493249	0.0156302	NFATC3/MAPK3/LAT/GSK3B/AKT3/PIK3R3/PPP3CA/MAP2K1/NRAS	9
hsa04664	Fc epsilon RI signaling pathway	0.00583806	0.0182627	MAPK3/LAT/AKT3/PIK3R3/RAC1/MAP2K1/NRAS	7
hsa04924	Renin secretion	0.00632444	0.0192896	GNAI3/GNAI2/PPP3CA/PLCB3/KCNMA1/PLCB1/CALM3	7
hsa05211	Renal cell carcinoma	0.00632444	0.0192896	MAPK3/EP300/AKT3/PIK3R3/RAC1/MAP2K1/NRAS	7
hsa04727	GABAergic synapse	0.0074772	0.0225239	ADCY3/GABRG1/GNAI3/GNAO1/GNAI2/PLCL1/ADCY9/PRKCB	8
hsa04723	Retrograde endocannabinoid signaling	0.00781816	0.0232638	ADCY3/MAPK3/GABRG1/GNAI3/GNAO1/GNAI2/PLCB3/ADCY9/PRKCB/PLCB1/NDUFS3	11
hsa05130	Pathogenic Escherichia coli infection	0.00792967	0.0233113	TUBA1A/TUBA1C/ARPC3/ARHGEF2/YWHAZ/CTNNB1	6
hsa05010	Alzheimer disease	0.00870221	0.0252778	MAPK3/GSK3B/RTN4/ATP5MC2/ADAM10/PPP3CA/PLCB3/ATP2A2/PLCB1/CALM3/NDUFS3/ATP2A1	12
hsa05219	Bladder cancer	0.00946996	0.0271843	MAPK3/RPS6KA5/E2F3/MAP2K1/NRAS	5
hsa04726	Serotonergic synapse	0.0113006	0.0318851	MAPK3/GNAI3/GNAO1/GNAI2/PLCB3/PRKCB/MAP2K1/PLCB1/NRAS	9
hsa05412	Arrhythmogenic right ventricular cardiomyopathy (ARVC)	0.0113689	0.0318851	ITGA11/TCF7L2/LMNA/CACNB3/CTNNB1/ATP2A2/ATP2A1	7
hsa05414	Dilated cardiomyopathy (DCM)	0.0116043	0.0321757	ADCY3/MYBPC3/ITGA11/LMNA/ADCY9/CACNB3/ATP2A2/ATP2A1	8
hsa04210	Apoptosis	0.0117938	0.0323337	MAPK3/TUBA1A/TUBA1C/AKT3/PIK3R3/PARP1/LMNA/MAP2K1/PIDD1/NRAS	10
hsa05034	Alcoholism	0.0127733	0.0346298	MAPK3/GNAI3/GNAO1/CAMKK2/GNAI2/HAT1/MAP2K1/PPP1CC/NRAS/PPP1CB/CALM3/BDNF	12
hsa04070	Phosphatidylinositol signaling system	0.0138107	0.0370308	DGKG/IP6K2/PIK3C3/PIK3R3/PLCB3/PRKCB/PLCB1/CALM3	8
hsa04922	Glucagon signaling pathway	0.0172098	0.0451525	EP300/PYGB/AKT3/PPP3CA/PLCB3/PPP4C/PLCB1/CALM3	8
hsa05142	Chagas disease (American trypanosomiasis)	0.0172098	0.0451525	MAPK3/GNAI3/GNAO1/GNAI2/AKT3/PIK3R3/PLCB3/PLCB1	8
hsa05221	Acute myeloid leukemia	0.0185974	0.048274	MAPK3/TCF7L2/AKT3/PIK3R3/MAP2K1/NRAS	6
hsa04012	ErbB signaling pathway	0.0188367	0.0483807	MAPK3/GSK3B/AKT3/PIK3R3/PRKCB/MAP2K1/NRAS	7
The KEGG pathway enrichment analysis for CAD
ID	Description	pvalue	p.adjust	geneID	Count
hsa04979	Cholesterol metabolism	1.10567e-11	2.67573e-09	LIPA/APOB/SORT1/LPA/LRP1/SCARB1/CETP/PLTP/LDLR/LPL/APOE/APOC1	12
hsa04933	AGE-RAGE signaling pathway in diabetic complications	4.48371e-07	5.13036e-05	TGFB1/ICAM1/VEGFA/FN1/PLCG1/COL4A2/RAC1/NOS3/SMAD3/RELA/COL4A1	11
hsa04151	PI3K-Akt signaling pathway	6.35995e-07	5.13036e-05	IL6R/PDGFD/EPOR/IFNA8/PRKAA2/PPP2R3A/ITGB5/FLT1/VEGFA/FN1/CDKN1A/COL4A2/RAC1/COL6A3/NOS3/GNGT2/LAMB2/RELA/COL4A1/SGK1	20
hsa04510	Focal adhesion	7.09227e-05	0.00429082	PDGFD/PPP1CC/BCAR1/ITGB5/FLT1/VEGFA/FN1/COL4A2/RAC1/COL6A3/LAMB2/COL4A1	12
hsa05231	Choline metabolism in cancer	0.000165841	0.00706252	SLC22A3/PDGFD/PLCG1/SLC44A2/RAC1/PLPP3/SLC22A1/SLC22A2	8
hsa05212	Pancreatic cancer	0.000175104	0.00706252	TGFB1/VEGFA/CDKN1A/RAC1/SMAD3/RELA/CDKN2A	7
hsa04926	Relaxin signaling pathway	0.00021148	0.0070647	TGFB1/ARRB2/VEGFA/COL4A2/NOS3/SMAD3/GNGT2/RELA/COL4A1	9
hsa04066	HIF-1 signaling pathway	0.000233544	0.0070647	IL6R/IFNGR2/FLT1/VEGFA/PLCG1/CDKN1A/NOS3/RELA	8
hsa05205	Proteoglycans in cancer	0.000365166	0.00981891	TGFB1/MRAS/TWIST1/PPP1CC/ITGB5/VEGFA/FN1/PLCG1/CDKN1A/RAC1/FZD7	11
hsa04512	ECM-receptor interaction	0.00041039	0.00993145	ITGB5/FN1/COL4A2/COL6A3/LAMB2/DAG1/COL4A1	7
hsa05222	Small cell lung cancer	0.000660226	0.0139654	FN1/CDKN1A/COL4A2/CDKN2B/LAMB2/RELA/COL4A1	7
hsa05165	Human papillomavirus infection	0.000713938	0.0139654	STAT2/IFNA8/TUBG1/PPP2R3A/ITGB5/VEGFA/FN1/CDKN1A/COL4A2/FZD7/COL6A3/LAMB2/RELA/COL4A1	14
hsa05146	Amoebiasis	0.000750209	0.0139654	TGFB1/RAB5C/FN1/COL4A2/LAMB2/RELA/COL4A1	7
hsa05167	Kaposi sarcoma-associated herpesvirus infection	0.00275498	0.0476218	STAT2/IFNA8/ICAM1/VEGFA/PLCG1/CDKN1A/RAC1/GNGT2/RELA	9
The KEGG pathway enrichment analysis for T2D
ID	Description	pvalue	p.adjust	geneID	Count
hsa04950	Maturity onset diabetes of the young	8.58035e-07	0.000229095	HNF1B/GCK/FOXA3/HNF1A/HHEX/HNF4A/NEUROG3/SLC2A2	8
hsa05202	Transcriptional misregulation in cancer	2.24064e-05	0.00299125	EYA1/CDKN2C/RXRA/BCL2A1/RUNX1/HMGA2/HOXA11/REL/HOXA9/PLAT/CD40/RELA/SIN3A/CCND2/PPARG/HHEX/CEBPB/CDKN1B	18
hsa04930	Type II diabetes mellitus	0.000544648	0.0484737	IRS1/ABCC8/GCK/HKDC1/KCNJ11/CACNA1A/SLC2A2	7
The KEGG pathway enrichment analysis for HDL
ID	Description	pvalue	p.adjust	geneID	Count
hsa04979	Cholesterol metabolism	1.87232e-23	4.13782e-21	LCAT/PLTP/SCARB1/LPL/LIPC/APOC2/CETP/SORT1/APOB/LIPG/ABCA1/STARD3/ANGPTL4/LPA/CD36/APOC1/APOE/APOC3/APOA1/APOA4	20
hsa03320	PPAR signaling pathway	4.14842e-06	0.000312496	FADS2/PLTP/LPL/NR1H3/ANGPTL4/CD36/APOA5/APOC3/APOA1	9
hsa04975	Fat digestion and absorption	4.24203e-06	0.000312496	SCARB1/APOB/ABCA1/CD36/DGAT2/APOA1/APOA4	7
hsa00561	Glycerolipid metabolism	0.000498395	0.0266332	LPL/LIPC/LIPG/DGKZ/DGAT2/GPAM	6
hsa04977	Vitamin digestion and absorption	0.000602562	0.0266332	SCARB1/APOB/APOA1/APOA4	4
The KEGG pathway enrichment analysis for LDL
ID	Description	pvalue	p.adjust	geneID	Count
hsa04979	Cholesterol metabolism	1.69981e-23	2.92367e-21	ANGPTL3/LPA/APOB/CYP7A1/PCSK9/SORT1/CETP/APOE/LDLR/APOC2/APOC3/ABCG5/APOA4/LIPC/ABCG8/APOC1/LIPG/ABCA1/LPL	19
hsa04975	Fat digestion and absorption	1.15702e-06	9.95033e-05	NPC1L1/APOB/PLA2G1B/ABCG5/APOA4/ABCG8/ABCA1	7
hsa00561	Glycerolipid metabolism	0.000175172	0.0100432	ALDH2/LPIN3/LIPC/GPAM/LIPG/LPL	6
hsa04976	Bile secretion	0.000436306	0.0158996	SLC22A1/CYP7A1/LDLR/ABCG5/ABCG8/HMGCR	6
hsa00601	Glycosphingolipid biosynthesis - lacto and neolacto series	0.000462198	0.0158996	ST3GAL4/ABO/FUT1/FUT2	4
The KEGG pathway enrichment analysis for TC
ID	Description	pvalue	p.adjust	geneID	Count
hsa04979	Cholesterol metabolism	1.03138e-20	1.94932e-18	ANGPTL3/LIPC/LPA/CYP7A1/APOB/SORT1/CETP/PCSK9/ABCA1/APOE/LDLR/APOA4/ABCG5/LCAT/ABCG8/ABCB11/APOA1/APOC3	18
hsa04975	Fat digestion and absorption	1.7625e-07	1.66557e-05	NPC1L1/APOB/ABCA1/PLA2G1B/APOA4/ABCG5/ABCG8/APOA1	8
hsa04976	Bile secretion	0.000122161	0.00769616	SLC22A1/CYP7A1/LDLR/ABCG5/ABCG8/ABCB11/HMGCR	7
hsa04977	Vitamin digestion and absorption	0.000474581	0.022424	APOB/APOA4/APOA1/SLC5A6	4
hsa00601	Glycosphingolipid biosynthesis - lacto and neolacto series	0.000755942	0.0285746	ST3GAL4/ABO/FUT1/FUT2	4
The KEGG pathway enrichment analysis for TG
ID	Description	pvalue	p.adjust	geneID	Count
hsa04979	Cholesterol metabolism	6.47682e-19	9.32662e-17	ANGPTL3/PLTP/LIPC/APOC2/LPL/APOB/CETP/APOA1/APOA4/LPA/APOC3/ANGPTL4/APOC1/ABCA1/CYP7A1/APOE	16
hsa03320	PPAR signaling pathway	4.03048e-08	2.90194e-06	PLTP/LPL/FADS2/APOA1/PPARG/APOC3/ANGPTL4/APOA5/CYP7A1/NR1H3	10
hsa04977	Vitamin digestion and absorption	0.000231872	0.0111299	SLC5A6/APOB/APOA1/APOA4	4
